# Supplementary material for: An exceptionally preserved armored dinosaur reveals the morphology and allometry of osteoderms and their horny epidermal coverings
Source: PeerJ. 2017 Nov 29;5:e4066. doi: 10.7717/peerj.4066 (PMC5712211; doi:10.7717/peerj.4066)
Supplement: Supplemental Information 1 — Linear measurements for the in situ osteoderms of TMP 2011.033.0001. See Fig. 4 for the osteoderm nomenclatural scheme. [file peerj-05-4066-s001.xlsx]

## Sheet: Sheet1
Element ID	Region	Row	Column	Side	Anteroposterior basal length (mm)	Transverse basal width (mm)	Height (mm)	Spine length (mm)
C1AR	Cervical	1	A	R	81	107	27	88
C1AL	Cervical	1	A	L	74	117	24	90
C1BR	Cervical	1	B	R	114	92	70	183
C1BL	Cervical	1	B	L	110	98	64	165
C1CR	Cervical	1	C	R	130	64*	50	148
C1CL	Cervical	1	C	L	125	60*	64	150
C2AR	Cervical	2	A	R	125	132	44	163
C2AL	Cervical	2	A	L	131	139	40	167
C2BR	Cervical	2	B	R	145	100	82	225
C2BL	Cervical	2	B	L	151	107	82	243
C2CR	Cervical	2	C	R	135	95*	81	160
C2CL	Cervical	2	C	L	124	83*	95	163
C3AR	Cervical	3	A	R	149	172	45	193
C3AL	Cervical	3	A	L	157	168	45	194
C3BR	Cervical	3	B	R	181	122	87	254
C3BL	Cervical	3	B	L	166	115	83	274
C3CR	Cervical	3	C	R	154	94*	86	215
C3CL	Cervical	3	C	L	156	92*	98	196
Tr1AR	Transitional	1	A	R	121	50	63	150
Tr1AL	Transitional	1	A	L	96	62	78	117
Tr1BR	Transitional	1	B	R	195	92*	142	258
Tr1BL	Transitional	1	B	L	182	105*	142	297
T1AR	Thoracic	1	A	R	92	81	15	94
T1AL	Thoracic	1	A	L	97	92	20	98
T1BR	Thoracic	1	B	R	98	80	18	97
T1BL	Thoracic	1	B	L	101	90	21	101
T1CR	Thoracic	1	C	R	111	83	18	113
T1CL	Thoracic	1	C	L	100	85	20	112
T1DR	Thoracic	1	D	R	145	84	35	149
T1DL	Thoracic	1	D	L	122	109	49	145
T1ER	Thoracic	1	E	R	132	95	63	144
T1EL	Thoracic	1	E	L	129	65	60	151
T1FR	Thoracic	1	F	R	136	80*	234	523
T1FL	Thoracic	1	F	L	149	106*	264	534
T2AR	Thoracic	2	A	R	69	64	11	74
T2AL	Thoracic	2	A	L	71	75	13	66
T2BR	Thoracic	2	B	R	68	68	13	65
T2BL	Thoracic	2	B	L	73	80	14	75
T2CR	Thoracic	2	C	R	68	63	16	69
T2CL	Thoracic	2	C	L	73	118	21	78
T2DR	Thoracic	2	D	R	81	90	25	75
T2ER	Thoracic	2	E	R	76	62	21	142
T2EL	Thoracic	2	E	L	71	82	28	126
T2FR	Thoracic	2	F	R	122	90	36	144
T2FL	Thoracic	2	F	L	132	84	41	153
T2GR	Thoracic	2	G	R	130	94	40	153
T2GL	Thoracic	2	G	L	130	102	65	166
T2HR	Thoracic	2	H	R	120	-	55	154
T2HL	Thoracic	2	H	L	123	69*	54	158
T3AR	Thoracic	3	A	R	57	76	9	56
T3AL	Thoracic	3	A	L	68	76	12	68
T3BR	Thoracic	3	B	R	54	57	9	54
T3BL	Thoracic	3	B	L	52	92	10	54
T3CR	Thoracic	3	C	R	37	72	11	41
T3CL	Thoracic	3	C	L	50	106	10	52
T4AR	Thoracic	4	A	R	72	82	11	70
T4AL	Thoracic	4	A	L	68	51	10	66
T4BR	Thoracic	4	B	R	68	72	12	42
T4BL	Thoracic	4	B	L	72	61	7	72
T4CR	Thoracic	4	C	R	75	73	11	77
T4CL	Thoracic	4	C	L	72	80	7	70
T4DR	Thoracic	4	D	R	62	68	13	70
T4DL	Thoracic	4	D	L	70	75	11	77
T4ER	Thoracic	4	E	R	53	65	12	72
T4EL	Thoracic	4	E	L	87	71	9	84
T4FR	Thoracic	4	F	R	57	70	19	97
T4FL	Thoracic	4	F	L	58	78	12	92
T4GR	Thoracic	4	G	R	105	71	34	127
T4GL	Thoracic	4	G	L	111	93	21	124
T4HR	Thoracic	4	H	R	109	66	30	115
T5AR	Thoracic	5	A	R	78	68	10	73
T5AL	Thoracic	5	A	L	75	81	11	76
T5BR	Thoracic	5	B	R	66	60	9	67
T5BL	Thoracic	5	B	L	76	71	10	72
T5CR	Thoracic	5	C	R	65	82	13	64
T5CL	Thoracic	5	C	L	56	74	9	58
T5DR	Thoracic	5	D	R	64	75	14	75
T5DL	Thoracic	5	D	L	56	77	10	62
T5ER	Thoracic	5	E	R	53	54	9	61
T5EL	Thoracic	5	E	L	50	94	11	57
T5FR	Thoracic	5	F	R	51	56	11	63
T5GR	Thoracic	5	G	R	77	86	20	97
T5HR	Thoracic	5	H	R	80	77	12	95
T5IR	Thoracic	5	I	R	73	72	16	92
T5JR	Thoracic	5	J	R	79	77	32	92
T5KR	Thoracic	5	K	R	77	57	26	101
T5LR	Thoracic	5	L	R	102	63	27	121
T6AR	Thoracic	6	A	R	79	-	13	76
T6AL	Thoracic	6	A	L	81	83	11	82
T6BR	Thoracic	6	B	R	77	73	9	78
T6BL	Thoracic	6	B	L	77	72	11	78
T6CR	Thoracic	6	C	R	70	75	11	70
T6CL	Thoracic	6	C	L	52	99	12	51
T6DR	Thoracic	6	D	R	70	66	13	74
T6DL	Thoracic	6	D	L	57	78	9	59
T6ER	Thoracic	6	E	R	55	57	8	65
T6FR	Thoracic	6	F	R	43	62	16	53
T7AR	Thoracic	7	A	R	77	58	12	75
T7AL	Thoracic	7	A	L	75	78	11	71
T7BR	Thoracic	7	B	R	79	78	9	77
T7BL	Thoracic	7	B	L	65	74	11	74
T7CR	Thoracic	7	C	R	78	87	12	78
T7CL	Thoracic	7	C	L	56	76	8	57
T7DR	Thoracic	7	D	R	71	99	14	88
T7ER	Thoracic	7	E	R	73	79	16	88
T7FR	Thoracic	7	F	R	82	95	18	101
T7GR	Thoracic	7	G	R	62	87	17	91
T7HR	Thoracic	7	H	R	58	68	19	83
T7IR	Thoracic	7	I	R	65	80	-	-
T7JR	Thoracic	7	J	R	-	-	36	-
T7KR	Thoracic	7	K	R	90	50	42	99
T8AR	Thoracic	8	A	R	74	76	13	71
T8BR	Thoracic	8	B	R	74	78	7	73
T8BL	Thoracic	8	B	L	72	69	8	66
T8CR	Thoracic	8	C	R	70	79	7	72
T8CL	Thoracic	8	C	L	68	76	7	70
T8DR	Thoracic	8	D	R	66	76	9	66
T8ER	Thoracic	8	E	R	55	55	6	60
T8FR	Thoracic	8	F	R	62	54	12	60
T8GR	Thoracic	8	G	R	60	65	12	66
T8HR	Thoracic	8	H	R	56	74	13	63
T8IR	Thoracic	8	I	R	64	77	18	77
T8KR	Thoracic	8	K	R	-	60	22	-
T8LR	Thoracic	8	L	R	84	60	31	95
T8MR	Thoracic	8	M	R	83	53	33	96
T9AR	Thoracic	9	A	R	67	75	8	66
T9AL	Thoracic	9	A	L	74	81	9	71
T9BR	Thoracic	9	B	R	69	80	6	67
T9CR	Thoracic	9	C	R	62	81	9	68
T9DR	Thoracic	9	D	R	62	75	12	67
T9ER	Thoracic	9	E	R	58	73	9	65
T9FR	Thoracic	9	F	R	56	60	11	53
T9GR	Thoracic	9	G	R	40	45	8	47
T9HR	Thoracic	9	H	R	39	64	10	40
T9IR	Thoracic	9	I	R	-	55	-	-
T10AL	Thoracic	10	A	L	64	61	-	-
T10DR	Thoracic	10	D	R	-	84	-	-
T10ER	Thoracic	10	E	R	-	74	-	-
T10JR?	Thoracic	10	J?	R	51	83	16	57
T10KR?	Thoracic	10	K?	R	61	80	16	72
T10LR?	Thoracic	10	L?	R	70	84	23	75
T10MR?	Thoracic	10	M?	R	62	59	25	70
T11AR	Thoracic	11	A	R	66	68	-	-
T11BR	Thoracic	11	B	R	63	73	-	-
T11IR?	Thoracic	11	I?	R	47	83	14	52
T11JR?	Thoracic	11	J?	R	50	78	15	52
T11KR?	Thoracic	11	K?	R	55	72	14	59
T11LR?	Thoracic	11	L?	R	62	72	14	66
T12AR	Thoracic	12	A	R	62	82	-	-
T12IR	Thoracic	12	I?	R	48	78	8	47
T12JR	Thoracic	12	J?	R	46	69	6	49
T12KR	Thoracic	12	K?	R	50	71	9	50
S1AR	Sacral	1	A	R	61	-	-	-
S1BR	Sacral	1	B	R	71	75	-	-
S1CR	Sacral	1	C	R	-	84	-	-
S1DR	Sacral	1	D	R	-	82	-	-
S2AR	Sacral	2	A	R	68	-	-	-
S2AL	Sacral	2	A	L	71	74	-	-
S2BR	Sacral	2	B	R	72	88	-	-
S2BL	Sacral	2	B	L	68	-	-	-
S2CR	Sacral	2	C	R	-	-	-	-
S2DR	Sacral	2	D	R	83	-	-	-
S3AR	Sacral	3	A	R	72	85	-	-
S3BL	Sacral	3	B	L	75	100	-	-
S4BR	Sacral	4	B	R	83	86	-	-
S4BL	Sacral	4	B	L	77	88	-	-
S5AL	Sacral	5	A	L	78	71	-	-
S5BL	Sacral	5	B	L	84	78	-	-
S5CL	Sacral	5	C	L	75	77	-	-
S6AL	Sacral	6	A	L	88	78	-	-
S6BR	Sacral	6	B	R	85	82	-	-
S6BL	Sacral	6	B	L	88	87	-	-
S7AR	Sacral	7	A	R	87	70	-	-
