# Supplementary material for: An exceptionally preserved armored dinosaur reveals the morphology and allometry of osteoderms and their horny epidermal coverings
Source: PeerJ. 2017 Nov 29;5:e4066. doi: 10.7717/peerj.4066 (PMC5712211; doi:10.7717/peerj.4066)
Supplement: Supplemental Information 2 — Linear measurements of osteoderms bony core length and keratinous only sheath length. See Fig. 4 for the osteoderm nomenclatural scheme. [file peerj-05-4066-s002.xlsx]

## Sheet: Sheet1
Element	Bony core length (mm)	Total length (mm)	Sheath only length (mm)	Sheath Percent	Percent Increase
C1BR	133.6	160.8	27.2	16.9154	120.359
C1BL	129.8	160.9	31.1	19.3288	123.96
C1CL	132.9	149.2	16.3	10.9249	112.265
C2AR	141.6	162.7	21.1	12.9687	114.901
C2AL	145.4	160.2	14.8	9.23845	110.179
C2BR	189.4	228.8	39.4	17.2203	120.803
C2BL	192.6	231.2	38.6	16.6955	120.042
C2CL	161.1	182.2	21.1	11.5807	113.097
C3BR	229.9	255	25.1	9.84314	110.918
C3BL	237.4	279.9	42.5	15.184	117.902
Tr1AR	125.5	146.3	20.78	14.2037	116.574
Tr1AL	117.1	127.7	10.6	8.3007	109.052
Tr1BR	237.6	262.6	25	9.52018	110.522
Tr1BL	239.2	287.2	48	16.7131	120.067
T1ER	137.7	147.4	9.7	6.58073	107.044
T1EL	144.5	153.2	8.7	5.67885	106.021
T1FL	397.3	528.4	131.1	24.8107	132.998
T2FL	152.4	161.4	9	5.57621	105.906
T2GL	151.8	165.9	14.1	8.4991	109.289
T2HR	129.7	146.9	17.2	11.7086	113.261
T4FL	80.3	83.2	2.9	3.48558	103.611
T4GR	126.1	131.3	5.2	3.9604	104.124
T5JR	96.5	99.8	3.3	3.30661	103.42
T10KR?	68	72.4	4.4	6.07735	106.471
T11JR?	52.5	53.2	0.7	1.31579	101.333
Note: The value for sheath only length for the left parascapular spine (T1FL) represents a conservative midpoint (131.2 mm) between the potentail range of 117 and 154 mm
