# Supplementary material for: An exceptionally preserved armored dinosaur reveals the morphology and allometry of osteoderms and their horny epidermal coverings
Source: PeerJ. 2017 Nov 29;5:e4066. doi: 10.7717/peerj.4066 (PMC5712211; doi:10.7717/peerj.4066)
Supplement: Supplemental Information 3 — Selection of horn measurements for extant mammals and squamates. Derived both from the literature and orignial measurements. [file peerj-05-4066-s003.xlsx]

## Sheet: Sheet1
Taxon	Horncore Length (mm)	Total Sheath Length (mm)	Sheath Only Length (mm)	Specimen	Source	Notes
Antilocapra americana	111	284.7	173.7	YPM 1513	Borkovic, 2013	male - left
Antilocapra americana	139.3	308.3	169	NMNH 53512	Borkovic, 2013	male - left
Antilocapra americana	148.3	360.7	212.3	NMNH 266158	Borkovic, 2013	male - left
Bison bison	224	365	141	98954	Borkovic, 2013	female - sides averaged - ventral length
Bison bison	180	407	227	88.26.1	Borkovic, 2013	female - sides averaged - ventral length
Bison bison	169	355	187	93.19.1	Borkovic, 2013	female - sides averaged - ventral length
Bison bison	159	374	216	35707	Borkovic, 2013	female - sides averaged - ventral length
Bison bison	150	392	242	3401	Borkovic, 2013	female - sides averaged - ventral length
Bison bison	167	356	189	80247	Borkovic, 2013	female - sides averaged - ventral length
Bison bison	197	370	173	51416	Borkovic, 2013	female - sides averaged - ventral length
Bison bison	254	368	114	73615	Borkovic, 2013	male - sides averaged - ventral length
Bison bison	288	444	156	86950	Borkovic, 2013	male - sides averaged - ventral length
Bison bison	275	477	202	45416	Borkovic, 2013	male - sides averaged - ventral length
Bison bison	266	426	160	20126	Borkovic, 2013	male - sides averaged - ventral length
Bison bison	276	530	254	89.10.2	Borkovic, 2013	male - sides averaged - ventral length
Bison bison	248	439	191	89.10.3	Borkovic, 2013	male - sides averaged - ventral length
Bison bison	261	448	187	89.10.4	Borkovic, 2013	male - sides averaged - ventral length
Bison bison	238	407	170	89.10.5	Borkovic, 2013	male - sides averaged - ventral length
Bison bison	266	450	185	90.2.2	Borkovic, 2013	male - sides averaged - ventral length
Bison bison	253	514	261	75121	Borkovic, 2013	male - sides averaged - ventral length
Bison bison	182	324	142	3405	Borkovic, 2013	male - sides averaged - ventral length
Bos taurus	173	297	124	NA	Grigson, 1975	Digitized using Plot Digitzer V2.6.3
Bos taurus	191	319	128	NA	Grigson, 1975	Digitized using Plot Digitzer V2.6.3
Bos taurus	257	420	163	NA	Grigson, 1975	Digitized using Plot Digitzer V2.6.3
Bos taurus	266	429	163	NA	Grigson, 1975	Digitized using Plot Digitzer V2.6.3
Bos taurus	271	417	146	NA	Grigson, 1975	Digitized using Plot Digitzer V2.6.3
Bos taurus	293	471	179	NA	Grigson, 1975	Digitized using Plot Digitzer V2.6.3
Bos taurus	356	498	143	NA	Grigson, 1975	Digitized using Plot Digitzer V2.6.3
Bos taurus	646	960	314	NA	Grigson, 1975	Digitized using Plot Digitzer V2.6.3
Bos taurus	261	343	82	NA	Grigson, 1975	Digitized using Plot Digitzer V2.6.3
Bos taurus	267	384	117	NA	Grigson, 1975	Digitized using Plot Digitzer V2.6.3
Bos taurus	274	374	100	NA	Grigson, 1975	Digitized using Plot Digitzer V2.6.3
Bos taurus	275	392	118	NA	Grigson, 1975	Digitized using Plot Digitzer V2.6.3
Bos taurus	278	388	111	NA	Grigson, 1975	Digitized using Plot Digitzer V2.6.3
Bos taurus	283	379	96	NA	Grigson, 1975	Digitized using Plot Digitzer V2.6.3
Bos taurus	339	403	64	NA	Grigson, 1975	Digitized using Plot Digitzer V2.6.3
Bos taurus	366	464	98	NA	Grigson, 1975	Digitized using Plot Digitzer V2.6.3
Bos taurus	427	519	92	NA	Grigson, 1975	Digitized using Plot Digitzer V2.6.3
Bos taurus	445	556	111	NA	Grigson, 1975	Digitized using Plot Digitzer V2.6.3
Capra ibex ibex	570	930	360	NA	Bubenik, 1990	Averages, see ref.
Capra ibex siberica	377	1204	827	NA	Bubenik, 1991	Averages, see ref.
Oreamnos harringtoni	72.6	164.4	91.8	NA	Mead and Lawlor, 1994	Averages, see ref.
Oreamnos americanus	93.6	221.6	128	NA	Mead and Lawlor, 1994	Averages, see ref.
Oreamnos americanus	66.8	197.3	130.5	AMNH 35286	Borkovic, 2013	female - sides averaged - Posterior length
Oreamnos americanus	74	173.7	99.7	AMNH 122670	Borkovic, 2013	female - sides averaged - Posterior length
Oreamnos americanus	68.5	186.7	118.2	AMNH 130223	Borkovic, 2013	female - sides averaged - Posterior length
Oreamnos americanus	68.7	193.2	124.5	NMC 1900	Borkovic, 2013	female - sides averaged - Posterior length
Oreamnos americanus	75.7	175	99.3	Z92.24.1	Borkovic, 2013	female - sides averaged - Posterior length
Oreamnos americanus	67.8	179.5	111.7	UAMZ 5665	Borkovic, 2013	female - sides averaged - Posterior length
Oreamnos americanus	82.5	196.3	113.8	UAMZ 5668	Borkovic, 2013	female - sides averaged - Posterior length
Oreamnos americanus	82.7	210.8	128.2	UAMZ 5669	Borkovic, 2013	female - sides averaged - Posterior length
Oreamnos americanus	75.2	191.3	116.2	UAMZ 5671	Borkovic, 2013	female - sides averaged - Posterior length
Oreamnos americanus	73	177.7	104.7	YPM 14604	Borkovic, 2013	female - sides averaged - Posterior length
Oreamnos americanus	93	219.3	126.3	AMNH 35334	Borkovic, 2013	male - sides averaged - Posterior length
Oreamnos americanus	92.2	231.5	139.3	AMNH 70573	Borkovic, 2013	male - sides averaged - Posterior length
Oreamnos americanus	86.5	166.3	79.8	AMNH 122671	Borkovic, 2013	male - sides averaged - Posterior length
Oreamnos americanus	82.7	174.2	91.5	AMNH 175583	Borkovic, 2013	male - sides averaged - Posterior length
Oreamnos americanus	90	194.7	104.7	ROM 231191	Borkovic, 2013	male - sides averaged - Posterior length
Oreamnos americanus	84.5	194.2	109.7	NMC 75079	Borkovic, 2013	male - sides averaged - Posterior length
Oreamnos americanus	60.7	209.7	149	YPM 14605	Borkovic, 2013	NA - sides averaged - Posterior length
Ovis nivicola	228	740	512	NA	Bubenik, 1992	Averages, see ref.
Ovis dalli	275	1110	835	NA	Bubenik, 1993	Averages, see ref.
Ovis ammon	404	1078	674	NA	Bubenik, 1994	Averages, see ref.
Ovis canadensis nelsoni	422	1096	674	NA	Bubenik, 1995	Averages, see ref.
Ovis canadensis canadensis	387.5	1230	842.5	NA	Bubenik, 1996	Averages, see ref.
Phrynosoma solare	6.35	6.84	0.49	LACM 123351	Measured from DigiMorph	P1 - right
Phrynosoma solare	6.23	7.13	0.9	LACM 123351	Measured from DigiMorph	P2 - left
Phrynosoma solare	3.32	3.78	0.46	LACM 123351	Measured from DigiMorph	S3 - left
Phrynosoma solare	3.51	3.75	0.24	LACM 123351	Measured from DigiMorph	S3 - right
Phrynosoma cornutum	9.56	10.23	0.67	TNHC 1930	Measured from DigiMorph	P2 - right
Phrynosoma cornutum	2.72	3.4	0.68	TNHC 1930	Measured from DigiMorph	S3 - left
Phrynosoma cornutum	2.77	3.33	0.56	TNHC 1930	Measured from DigiMorph	S3 - right
Phrynosoma platyrhinos	3.69	4.1	0.41	TNHC 18496	Measured from DigiMorph	S2 - right
Phrynosoma platyrhinos	3.84	4.35	0.51	TNHC 18496	Measured from DigiMorph	S2 - left
Phrynosoma platyrhinos	1.64	2.02	0.38	TNHC 18496	Measured from DigiMorph	S3 - left
Phrynosoma platyrhinos	1.58	1.76	0.18	TNHC 18496	Measured from DigiMorph	S3 - right
Phrynosoma taurus	3.28	3.45	0.17	Museo de Zoologa, Facultad de Cineciad, U. N. A. M.)	Measured from DigiMorph	F0, right
Phrynosoma taurus	3.17	3.43	0.26	Museo de Zoologa, Facultad de Cineciad, U. N. A. M.)	Measured from DigiMorph	F0, left
Phrynosoma modestum	3.18	3.54	0.36	TNHC 48520	Measured from DigiMorph	S1 - right
Phrynosoma modestum	3.49	3.69	0.2	TNHC 48520	Measured from DigiMorph	P2 - left
Phrynosoma macallii	3.79	4.88	1.09	TNHC 062316	Measured from DigiMorph	S2 - right
Phrynosoma macallii	3.45	4.27	0.82	TNHC 062316	Measured from DigiMorph	S2 - left
Phrynosoma braconnieri	2.1	2.56	0.46	WLH 1117	Measured from DigiMorph	P2 - right
Phrynosoma braconnieri	3.12	3.44	0.32	WLH 1117	Measured from DigiMorph	P2 - left
Phrynosoma asio	4.98	5.6	0.62	WLH 1093	Measured from DigiMorph	F0 - left
Phrynosoma asio	4.74	5.09	0.35	WLH 1093	Measured from DigiMorph	F0 - right
Phrynosoma asio	6.39	7.37	0.98	WLH 1093	Measured from DigiMorph	P2 - right
Phrynosoma asio	6.48	7.44	0.96	WLH 1093	Measured from DigiMorph	P2 - left
Phyrnosoma asio	4.26	5.25	0.98	TMP 1990.007.0354	Measured by CMB using ocular micrometer	S2 - left
Phyrnosoma asio	4.51	5	0.49	TMP 1990.007.0354	Measured by CMB using ocular micrometer	F0 - left
Phyrnosoma asio	4.51	5.25	0.74	TMP 1990.007.0354	Measured by CMB using ocular micrometer	S1 - left
Phyrnosoma asio	4.84	5.74	0.9	TMP 1990.007.0354	Measured by CMB using ocular micrometer	S1 - right
Phyrnosoma asio	4.67	5.41	0.74	TMP 1990.007.0354	Measured by CMB using ocular micrometer	S2 - right
Phyrnosoma asio	4.43	5	0.57	TMP 1990.007.0354	Measured by CMB using ocular micrometer	F0 - right
Phyrnosoma asio	4.59	5.41	0.82	TMP 1990.007.0354	Measured by CMB using ocular micrometer	P2 - left
Phyrnosoma asio	5	5.82	0.82	TMP 1990.007.0354	Measured by CMB using ocular micrometer	P2 - right
Phyrnosoma asio	3.94	4.51	0.57	TMP 1990.007.0016	Measured by CMB using ocular micrometer	S2 - left
Phyrnosoma asio	4.18	5	0.82	TMP 1990.007.0017	Measured by CMB using ocular micrometer	S1 - left
Phyrnosoma asio	4.43	4.67	0.25	TMP 1990.007.0018	Measured by CMB using ocular micrometer	S2 - right
Phyrnosoma asio	4.59	5	0.41	TMP 1990.007.0019	Measured by CMB using ocular micrometer	S1 - right
Phyrnosoma asio	4.1	4.59	0.49	TMP 1990.007.0020	Measured by CMB using ocular micrometer	F0 - right
Phyrnosoma asio	4.76	5.17	0.41	TMP 1990.007.0021	Measured by CMB using ocular micrometer	F0 - left
Phyrnosoma asio	4.18	4.59	0.41	TMP 1990.007.0022	Measured by CMB using ocular micrometer	P2 - left
Phyrnosoma asio	5	5.41	0.41	TMP 1990.007.0023	Measured by CMB using ocular micrometer	P2 - right
Trioceros jacksonii	15.31	25.14	9.83	USEC/H-2927	du Plessis et al, 2017, GigaScience, 6, 2017, 1–11	measured from scale
Trioceros jacksonii	16.22	30.44	14.22	TMP 1990.007.0350	Measured by CMB using digital calipers	Rostral
Trioceros jacksonii	21.54	31.36	9.82	TMP 1990.007.0350	Measured by CMB using digital calipers	L. Orbital
Trioceros jacksonii	21.67	30.39	8.72	TMP 1990.007.0350	Measured by CMB using digital calipers	R. Oribital
